# Supplementary material
Source: publisher figshare collection journal article supplement (https://aacr.figshare.com/articles/dataset/_/23627059)
Supplement: Supplementary file 1 [file 41457781]

Supplemental Figure 3.

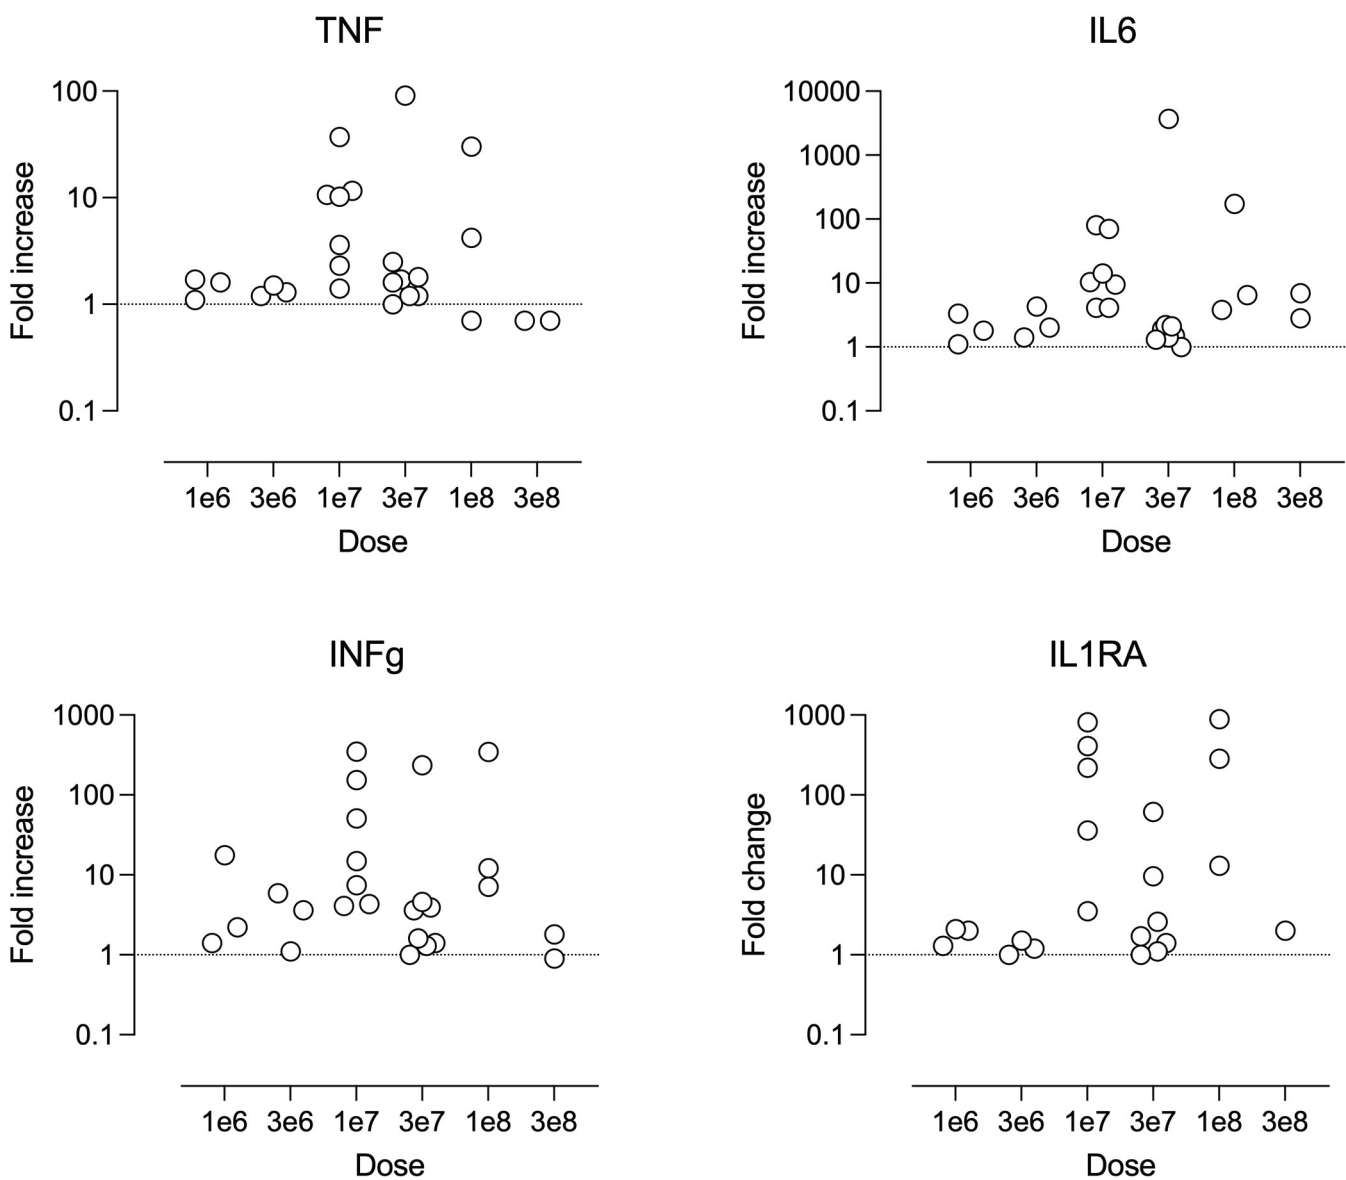

Supplemental Figure 3. Serum cytokine levels in subjects receiving SYN1891. The fold-change in serum cytokine level was calculated using baseline and samples collected 6 and 24 hours after injection with increasing doses of SYN1891. The fold-change for each subject is shown.
